# Supplementary material for: Artificial Neural Network (ANN) as a Tool to Reduce Human-Animal Interaction Improves Senegalese Sole Production
Source: MDPI journal article supplement (doi:10.3390/biom9120778), 2019-11-25

## Appendix A

**Supplementary Materials:** Table S1. Description of the human-animal interaction factor, the stimuli received by the fish and detailed frequency and number of events of each factor. Figure S1. A Phases of the artificial vision system developed to estimate the biomass of fish by image analysis. B.CNN architecture used to predict the biomass of a fish.

**Table S1. Main cultured fish disturbances**

| Human-animal interaction factor  | Stimuli from humans                               | Tanks     |            |           |            |
|----------------------------------|---------------------------------------------------|-----------|------------|-----------|------------|
|                                  |                                                   | CTRL      |            | EXP       |            |
|                                  |                                                   | Frequency | Cumulative | Frequency | Cumulative |
| Feeding                          | visual, olfactory, gustatory and auditory         | Daily     | 126        | Daily     | 126        |
| Partial emptying of the drain    | auditory                                          | Daily     | 126        | Daily     | 126        |
| Water temperature measurement    | visual and auditory                               | Daily     | 126        | Daily     | 126        |
| Profilactic treatment (Peroxide) | visual, olfactory, gustatory and auditory         | Fortnight | 8          | Fortnight | 8          |
| Manual biometric measurement     | tactil, visual, olfactory, gustatory and auditory | Monthly   | 4          | -         | 0          |

**Figure S1. Convolutional neuronal network workflow**

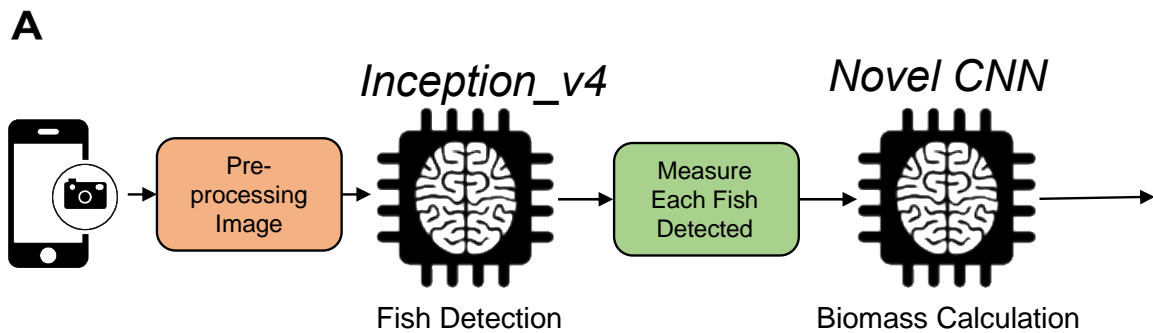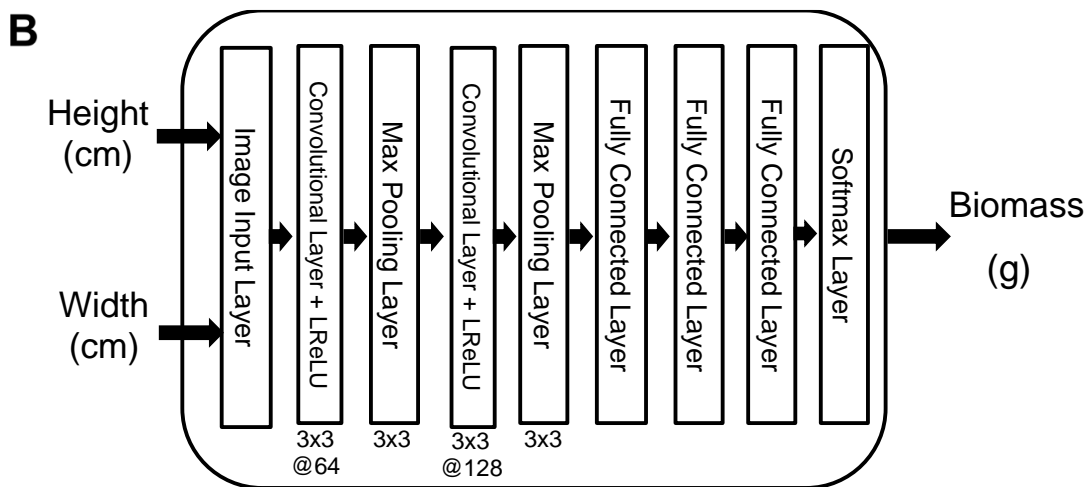

Supplement: s1 [file s1]
